# Supplementary material for: Altered social behavior and ultrasonic communication in the dystrophin-deficient mdx mouse model of Duchenne muscular dystrophy
Source: Springer Nature journal article supplement (doi:10.1186/s13229-015-0053-9), 2015-10-29
Supplement: MOESM3 [file 9785440]

Additional file 3: Supplementary results: Correlation analyses.

1. Correlations in distinct experimental contexts

Relationship between the amount of exploration of social stimuli and USVs production in distinct experimental contexts, as presented in Figure 6B in the paper, shows that USV production was strongly modulated by the social context. However, long time spent vocalizing was not systematically associated with long time spent investigating social stimuli across tests (see legend of Figure 6B). As shown in the table below, there was no significant correlation between percent time sniffing and percent time vocalizing across tests in both genotypes. However, note that *mdx* mice displayed inverse correlations as compared to WT mice when confronted to female bedding and during encounters with *mdx* male intruders (highlighted in bold letters).

| TASK         | Genotype | Correlation  |
|--------------|----------|--------------|
| URINE        | WT       | ,523         |
|              | MDX      | ,846         |
| BEDDING      | WT       | <b>,716</b>  |
|              | MDX      | <b>-,511</b> |
| ANESTHETIZED | WT       | ,224         |
|              | MDX      | ,527         |
| MALE-FEMALE  | WT       | -,606        |
|              | MDX      | -,075        |
| MALE-WT      | WT       | -,119        |
|              | MDX      | ,411         |
| MALE-MDX     | WT       | <b>-,635</b> |
|              | MDX      | <b>,696</b>  |

Percent time sniffing vs percent time vocalizing (all p>0.05; N.S.)

2. Detailed correlations in response to social stimuli

As shown in the tables below, during exposure to olfactory stimuli and anesthetized females, call amplitude (intensity) correlated with the number of sniffing episodes in WT mice (positive correlation in bedding and anesthetized female tasks, negative correlation in the urine task). In contrast, no significant correlation was found between behavioral and acoustic variables in *mdx* mice in these tasks.

Miranda R et al. Altered social behavior and ultrasonic communication in the dystrophin-deficient mdx mouse model of Duchenne muscular

Additional file 3: Supplementary results: Correlation analyses.

ANESTHETIZED FEMALE

| Genotype |               | Sniffing episodes | Time sniffing (%) |
|----------|---------------|-------------------|-------------------|
| WT       | Call rate     | ,590              | -,130             |
|          | Call duration | ,245              | -,159             |
|          | Pfreq(st)     | ,181              | -,007             |
|          | Pfreq(end)    | ,292              | ,036              |
|          | Pamp(st)      | ,536              | -,289             |
|          | Pamp(end)     | <b>,708(*)</b>    | -,415             |
| MDX      | Call rate     | ,209              | -,220             |
|          | Call duration | -,066             | ,146              |
|          | Pfreq(st)     | -,183             | -,065             |
|          | Pfreq(end)    | -,094             | -,064             |
|          | Pamp(st)      | ,325              | -,220             |
|          | Pamp(end)     | <b>,284</b>       | -,321             |

\* Correlation is significant at the 0.05 level (2-tailed).

FEMALE BEDDING

| Genotype |               | Sniffing episodes | Time sniffing (%) |
|----------|---------------|-------------------|-------------------|
| WT       | Call rate     | -,508             | ,412              |
|          | Call duration | -,182             | ,291              |
|          | Pfreq(st)     | ,067              | -,019             |
|          | Pfreq(end)    | ,291              | -,394             |
|          | Pamp(st)      | ,481              | ,055              |
|          | Pamp(end)     | <b>,819(*)</b>    | -,677             |
| MDX      | Call rate     | ,131              | -,336             |
|          | Call duration | ,454              | -,474             |
|          | Pfreq(st)     | ,467              | -,302             |
|          | Pfreq(end)    | ,478              | -,097             |
|          | Pamp(st)      | -,258             | ,253              |
|          | Pamp(end)     | <b>-,162</b>      | ,164              |

FEMALE URINE

| Genotype |               | Sniffing episodes | Time sniffing (%) |
|----------|---------------|-------------------|-------------------|
| WT       | Call rate     | -,040             | -,474             |
|          | Call duration | -,466             | ,693              |
|          | Pfreq(st)     | -,328             | -,381             |
|          | Pfreq(end)    | ,336              | -,040             |
|          | Pamp(st)      | <b>-,916(*)</b>   | -,349             |
|          | Pamp(end)     | -,788             | -,564             |
| MDX      | Call rate     | ,212              | ,022              |
|          | Call duration | ,300              | ,114              |
|          | Pfreq(st)     | -,058             | -,136             |
|          | Pfreq(end)    | -,584             | ,261              |
|          | Pamp(st)      | <b>,145</b>       | -,012             |
|          | Pamp(end)     | ,211              | -,030             |

Additional file 3: Supplementary results: Correlation analyses.

### 3. Detailed correlations during forced encounters with intruders

During social interactions (tables below), call rate was positively correlated with the number of pursuits performed by WT residents confronted with WT intruders. However, these parameters were uncorrelated in *mdx* residents. The number of dominant acts was positively correlated with call frequency and negatively correlated with call duration in WT mice, whereas in *mdx* mice dominant acts were only positively correlated with call amplitude (intensity).

#### MALE VS. WT INTRUDERS

| Resident genotype |               | Contacts (n) | Pursuits (n)   | Dominant acts (n) |
|-------------------|---------------|--------------|----------------|-------------------|
| WT                | Call rate     | ,508         | <b>,682(*)</b> | -,300             |
|                   | Call duration | ,002         | ,270           | <b>-,847(**)</b>  |
|                   | Pfreq(st)     | ,369         | ,109           | ,638              |
|                   | Pfreq(end)    | ,553         | ,333           | <b>,848(**)</b>   |
|                   | Pamp(st)      | ,138         | ,159           | -,497             |
|                   | Pamp(end)     | -,390        | -,361          | <b>-,614</b>      |
| MDX               | Call rate     | ,451         | <b>,245</b>    | ,556              |
|                   | Call duration | ,478         | ,413           | <b>,696</b>       |
|                   | Pfreq(st)     | -,514        | -,355          | -,601             |
|                   | Pfreq(end)    | -,260        | -,022          | <b>-,282</b>      |
|                   | Pamp(st)      | ,712         | ,699           | ,582              |
|                   | Pamp(end)     | ,561         | ,643           | <b>,815(*)</b>    |

\*\* Correlation is significant at the 0.01 level (2-tailed).

\* Correlation is significant at the 0.05 level (2-tailed).

In encounters with *mdx* intruders (below), measures in WT mice were uncorrelated whereas for *mdx* residents call frequency was negatively correlated with the number of contacts and pursuits.

#### MALE VS. MDX INTRUDER

| Resident genotype |               | Contacts (n)    | Pursuits (n)    | Dominant acts (n) |
|-------------------|---------------|-----------------|-----------------|-------------------|
| WT                | Call rate     | ,203            | ,196            | ,133              |
|                   | Call duration | ,229            | ,650            | ,695              |
|                   | Pfreq(st)     | <b>-,597</b>    | <b>-,012</b>    | -,353             |
|                   | Pfreq(end)    | -,390           | -,338           | -,538             |
|                   | Pamp(st)      | -,363           | ,030            | -,273             |
|                   | Pamp(end)     | -,428           | -,055           | -,465             |
| MDX               | Call rate     | -,005           | ,291            | ,221              |
|                   | Call duration | ,103            | ,315            | ,311              |
|                   | Pfreq(st)     | <b>-,672(*)</b> | <b>-,700(*)</b> | -,491             |
|                   | Pfreq(end)    | -,464           | -,512           | -,502             |
|                   | Pamp(st)      | -,350           | ,218            | ,415              |
|                   | Pamp(end)     | -,656           | -,459           | -,399             |

\* Correlation is significant at the 0.05 level (2-tailed).

**Miranda R et al. Altered social behavior and ultrasonic communication in the dystrophin-deficient mdx mouse model of Duchenne muscular**

**Additional file 3: Supplementary results: Correlation analyses.**

In male-female encounters (below) all variables in WT and *mdx* mice were not significantly correlated.

**MALE VS. FEMALE**

| Resident genotype |               | Contacts (n) | Time in contact (%) | Latency 1st contact |
|-------------------|---------------|--------------|---------------------|---------------------|
| WT                | Call rate     | ,559         | ,306                | -,071               |
|                   | Call duration | ,476         | ,266                | ,064                |
|                   | Pfreq(st)     | -,284        | -,420               | -,186               |
|                   | Pfreq(end)    | ,061         | -,102               | -,452               |
|                   | Pamp(st)      | ,260         | -,032               | ,318                |
|                   | Pamp(end)     | ,176         | -,324               | -,110               |
|                   |               |              |                     |                     |
| MDX               | Call rate     | -,228        | -,552               | -,061               |
|                   | Call duration | -,208        | -,465               | -,034               |
|                   | Pfreq(st)     | -,271        | -,378               | ,069                |
|                   | Pfreq(end)    | -,361        | -,501               | ,101                |
|                   | Pamp(st)      | ,402         | ,513                | -,338               |
|                   | Pamp(end)     | ,456         | ,440                | -,416               |

**4. Conclusion**

Several significant correlations detected in the WT mice were not found in *mdx* mice. This suggests a disorganization of the relationships between social behavior and ultrasonic communication in *mdx* mice.
